# Supplementary material for: Nomenclature of the triphylite group of minerals
Source: Copernicus journal article supplement (doi:10.5194/ejm-35-427-2023), 2023-06-22
Supplement: Supplementary file 1 [file ejm-35-427-2023-supplement.zip]

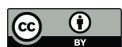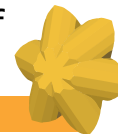

## *Supplement of*

# **Nomenclature of the triphylite group of minerals**

**Lyudmila M. Lyalina et al.**

*Correspondence to:* Lyudmila M. Lyalina (lialina@geoksc.apatity.ru)

- ejm-35-427-2023-supplement-title-page.pdf
- Supplement.xlsx

The copyright of individual parts of the supplement might differ from the article licence.
